# Supplementary material for: Prognosis of Hippocampal Function after Sub-lethal Irradiation Brain Injury in Patients with Nasopharyngeal Carcinoma
Source: PubMed Central journal article supplement (PMC5665929; doi:10.1038/s41598-017-13972-2), 2017-10-31
Supplement: 41598_2017_13972_MOESM1_ESM.pdf [file 41598_2017_13972_MOESM1_ESM.pdf]

## **Prognosis of Hippocampal Function after Sub-lethal Irradiation**

### **Brain Injury in Patients with Nasopharyngeal Carcinoma**

Sharon Chia-Ju Chen, PhD<sup>1,2</sup>, Yoshifumi Abe, PhD<sup>3</sup>, Pen-Tzu Fang, MD<sup>4</sup>, Ya-Ju Hsieh, PhD<sup>1</sup>, Yung-I Yang, BS<sup>1</sup>, Tzu-Ying Lu, MS<sup>4</sup>, Shoji Oda, PhD<sup>3</sup>, Hiroshi Mitani, PhD<sup>3</sup>, Shi-Long Lian, MD<sup>4</sup>, Yu-Chang Tyan, PhD<sup>1,2,5,6,7</sup>, Chih-Jen Huang, MD, PhD<sup>4,\*</sup>, Tatsuhiro Hisatsune, PhD<sup>3,8,\*</sup>

## **Supplementary Material**

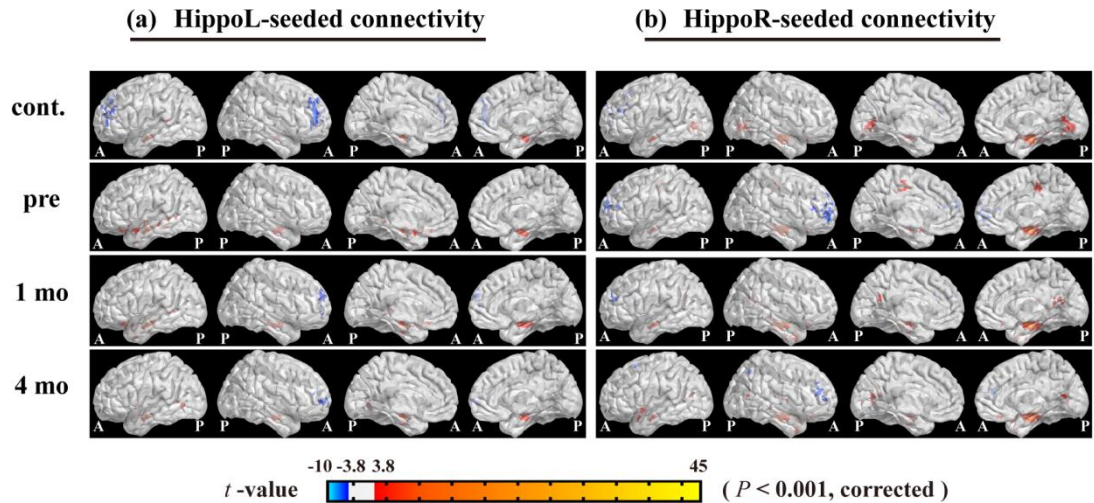

**Figure S1. Activation maps of the brain of patients with nasopharyngeal carcinoma compared between normal participants and the right and left hippocampi.**

The left column demonstrates the outcome calculated by the seed region of the left hippocampus. The right column demonstrates the outcome calculated by the seed region of the right hippocampus. Each row denotes the patients' results from pretreatment (pre), 1 month and 4 months after treatment (1 mo. and 4 mo.), and normal subjects' results. The statistical threshold was designated  $p$ -value  $< 0.001$  after AlphaSim cluster extension criteria under  $p$ -value  $< 0.01$ . Analysis by one-sample  $t$ -tests.

*Abbreviations:* HippoL, left hippocampus; HippoR, right hippocampus; cont, controls; ROI, region of interest.

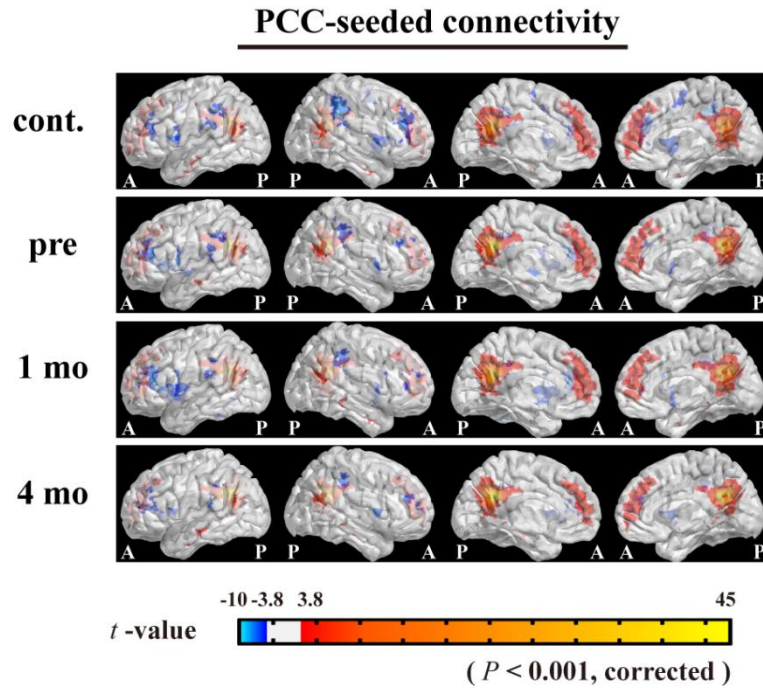

**Figure S2. Activation brain maps of NPC patients and normal participants (cont) after one-sample  $t$ -test analysis.** The seed region was set at PCC. Each row denotes pre-treatment (pre), 1 month and 4 months after treatment (1 mo. and 4 mo.), and normal subjects. The statistical threshold was designated under  $p$ -value  $< 0.001$  for activation and under  $p$ -value  $< 0.01$  the AlphaSim cluster extension criteria. Data was analyzed by a one-sample  $t$ -test by setting the seed region at the postcentral cortex (PCC: posterior cingulate cortex).

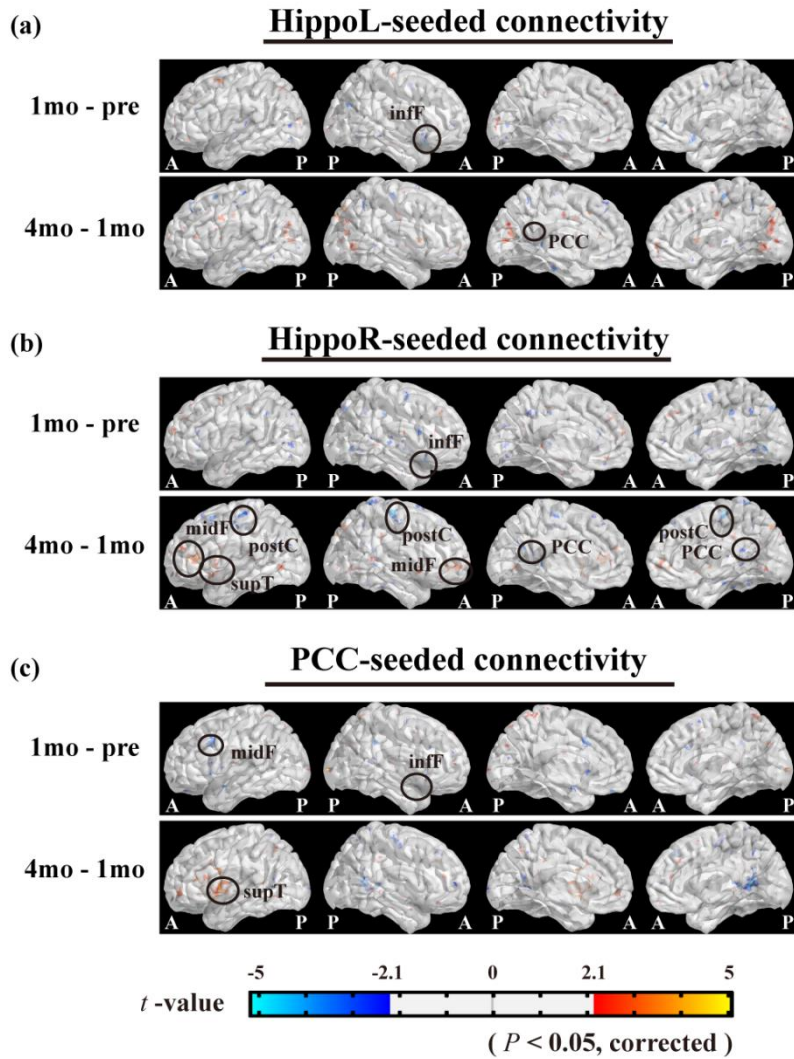

**Figure S3. Statistical maps of paired two-sample  $t$ -tests between the two sessions for each three seeded region of interest (ROI: region of interest) area. The statistical criterion for activation and AlphaSim criterion for cluster size were set at  $p$ -value  $< 0.05$ .**

PCC-seeded connectivity

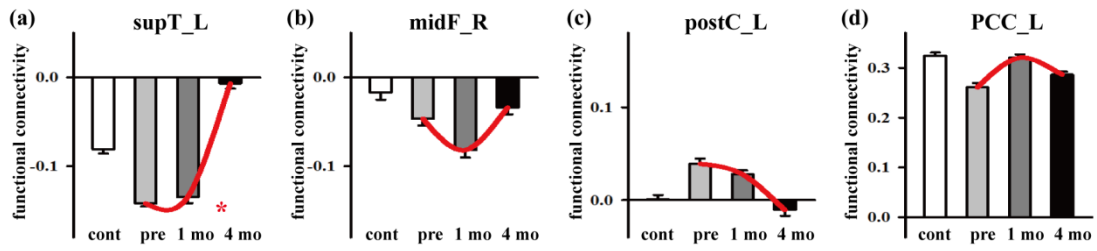

**Figure S4. Longitudinal analysis after repeated measurement ANOVA for PCC connectivity.** Functional connectivity was analyzed in the same four areas across three sessions. Only the supT\_L (left superior temporal lobe) was significantly affected. The statistical criterion was set at  $p$ -value  $< 0.05$  and cluster size constraint was set at  $p$ -value  $< 0.05$  after AlphaSim assessment.

**Table S1. Within-session seed-connective maps for each session.** Three seed ROI areas: (a) HippoL area; (b) HippoR area; and (c) PCC area were used to trace cognitive transition after radiotherapy (one-sample  $t$ -test;  $p$ -value  $< 0.001$  error probability for activation;  $p$ -value  $< 0.01$  for cluster size constraint).

(a)

| session | area      | side | vox | $t_{\max}$ | x   | y   | z   | side | vox | $t_{\max}$ | x  | y  | z   |
|---------|-----------|------|-----|------------|-----|-----|-----|------|-----|------------|----|----|-----|
| pre     | Amygdala  | L    | 20  | 13.72      | -27 | -6  | -18 | R    | 14  | 11.73      | 24 | -3 | -18 |
|         | Fusiform  | L    | 16  | 16.2       | -30 | -15 | -24 |      |     |            |    |    |     |
|         | Hippo     | L    | 92  | 48.15      | -24 | -12 | -21 | R    | 37  | 15.79      | 24 | -6 | -18 |
|         | infF      | L    | 34  | 9.31       | -24 | 27  | -24 |      |     |            |    |    |     |
|         | midT      | L    | 161 | 9.03       | -63 | -15 | -9  |      |     |            |    |    |     |
|         | Olfactory | L    | 11  | 10.46      | -21 | 6   | -18 |      |     |            |    |    |     |
|         | paraHippo | L    | 51  | 24.32      | -24 | -15 | -24 | R    | 43  | 14.87      | 21 | -9 | -21 |
| 1mo     | Amygdala  | L    | 28  | 11.64      | -24 | -3  | -21 |      |     |            |    |    |     |
|         | Fusiform  | L    | 65  | 20.79      | -30 | -15 | -24 |      |     |            |    |    |     |
|         | Hippo     | L    | 121 | 48.63      | -27 | -12 | -21 |      |     |            |    |    |     |
|         | Insula    | L    | 13  | 6.51       | -36 | -6  | -9  |      |     |            |    |    |     |
|         | Pallidum  | L    | 16  | 7.95       | -18 | -3  | 6   |      |     |            |    |    |     |
|         | paraHippo | L    | 74  | 27.47      | -27 | -15 | -24 |      |     |            |    |    |     |
|         | Putamen   | L    | 53  | 7.41       | -21 | 0   | 6   |      |     |            |    |    |     |
| 4mo     | Amygdala  | L    | 18  | 11.24      | -24 | -6  | -18 |      |     |            |    |    |     |
|         | Fusiform  | L    | 28  | 18.91      | -30 | -15 | -24 |      |     |            |    |    |     |
|         | Hippo     | L    | 75  | 39.15      | -24 | -9  | -21 |      |     |            |    |    |     |
|         | paraHippo | L    | 48  | 19.88      | -18 | -12 | -24 |      |     |            |    |    |     |
| norm    | Amygdala  | L    | 25  | 16.15      | -24 | -6  | -18 |      |     |            |    |    |     |
|         | Fusiform  | L    | 44  | 22.49      | -30 | -15 | -24 |      |     |            |    |    |     |
|         | Hippo     | L    | 107 | 55.4       | -27 | -12 | -21 |      |     |            |    |    |     |
|         | infP      | L    | 31  | 8.79       | -48 | -24 | 39  |      |     |            |    |    |     |
|         | midT      | L    | 35  | 8.84       | -60 | -42 | 9   |      |     |            |    |    |     |
|         | paraHippo | L    | 65  | 30.42      | -24 | -15 | -24 |      |     |            |    |    |     |
|         | postC     | L    | 99  | 8.25       | -60 | -18 | 36  |      |     |            |    |    |     |
|         | preC      | L    | 25  | 7.93       | -42 | -15 | 57  |      |     |            |    |    |     |
|         | SupraMarg | L    | 16  | 8.24       | -54 | -24 | 42  |      |     |            |    |    |     |
|         | supT      | L    | 88  | 8.21       | -57 | -30 | 9   |      |     |            |    |    |     |

(b)

| session | area      | side | vox | $t_{\max}$ | x   | y   | z   | side | vox | $t_{\max}$ | x  | y   | z   |
|---------|-----------|------|-----|------------|-----|-----|-----|------|-----|------------|----|-----|-----|
| pre     | Amygdala  |      |     |            |     |     |     | R    | 19  | 11.07      | 21 | -3  | -18 |
|         | Fusiform  | L    | 23  | 12.49      | -30 | -21 | -27 | R    | 40  | 11.26      | 33 | -24 | -24 |
|         | Hippo     | L    | 47  | 13.72      | -24 | -9  | -18 | R    | 86  | 38.46      | 24 | -12 | -21 |
|         | paraHippo | L    | 42  | 10.26      | -18 | -12 | -24 | R    | 120 | 51.02      | 24 | -12 | -24 |
| 1mo     | Amygdala  |      |     |            |     |     |     | R    | 28  | 10.27      | 21 | -3  | -18 |
|         | Fusiform  | L    | 49  | 9.19       | -27 | -21 | -27 | R    | 51  | 9.35       | 33 | -36 | -18 |
|         | Hippo     | L    | 56  | 11.74      | -18 | -12 | -21 | R    | 68  | 43.57      | 24 | -12 | -21 |
|         | paraHippo | L    | 80  | 12.17      | -24 | -21 | -27 | R    | 138 | 51.77      | 21 | -12 | -21 |
| 4mo     | Amygdala  |      |     |            |     |     |     | R    | 23  | 13.53      | 27 | -3  | -18 |
|         | Fusiform  | L    | 37  | 8.65       | -30 | -12 | -33 | R    | 10  | 9.61       | 27 | -27 | -21 |
|         | Hippo     | L    | 50  | 12.2       | -24 | -9  | -21 | R    | 78  | 31.44      | 27 | -9  | -21 |
|         | paraHippo | L    | 38  | 8.82       | -18 | -12 | -24 | R    | 92  | 29.63      | 21 | -12 | -21 |
| norm    | Amygdala  | L    | 15  | 10.72      | -24 | -6  | -18 | R    | 14  | 11.5       | 27 | -3  | -18 |
|         | Fusiform  | L    | 25  | 8.33       | -30 | -15 | -24 | R    | 40  | 7.06       | 27 | -39 | -12 |
|         | Hippo     | L    | 66  | 13.01      | -24 | -9  | -21 | R    | 82  | 39.59      | 24 | -12 | -21 |

|           |   |    |      |     |     |     |   |     |       |    |     |     |
|-----------|---|----|------|-----|-----|-----|---|-----|-------|----|-----|-----|
| Lingual   | L | 82 | 7.09 | 0   | -75 | 0   | R | 75  | 10.72 | 9  | -78 | -12 |
| orbF      |   |    |      |     |     |     | R | 30  | 6.87  | 24 | 24  | -24 |
| paraHippo | L | 47 | 8.45 | -21 | -18 | -24 | R | 106 | 34.34 | 24 | -12 | -24 |

(c)

| session | area      | side      | vox   | t <sub>max</sub> | x     | y   | z   | side | vox | t <sub>max</sub> | x     | y   | z   |    |
|---------|-----------|-----------|-------|------------------|-------|-----|-----|------|-----|------------------|-------|-----|-----|----|
| pre     | ACC       | L         | 103   | 9.28             | 0     | 48  | 15  | R    | 83  | 9.85             | 3     | 48  | 24  |    |
|         | Angular   | L         | 122   | 11.98            | -42   | -63 | 24  | R    | 150 | 13.52            | 48    | -63 | 24  |    |
|         | Calcarine | L         | 127   | 22.7             | -3    | -63 | 15  | R    | 110 | 22.14            | 3     | -60 | 18  |    |
|         | Cuneus    | L         | 93    | 26.92            | -6    | -63 | 24  | R    | 22  | 10.29            | 3     | -72 | 30  |    |
|         | infF      | L         | 297   | -3.97            | -39   | 45  | 6   | R    | 116 | 5.31             | 39    | 18  | 33  |    |
|         | infP      | L         | 74    | -3.97            | -57   | -33 | 42  | R    | 56  | -3.97            | 51    | -45 | 51  |    |
|         | infT      |           |       |                  |       |     |     | R    | 14  | 5.86             | 54    | -18 | -18 |    |
|         | Insula    | L         | 133   | -3.98            | -45   | -6  | 0   | R    | 113 | -3.98            | 33    | 15  | 12  |    |
|         | Lingual   | L         | 25    | 9.68             | -6    | -63 | 6   | R    | 23  | 8.08             | 6     | -57 | 6   |    |
|         | MCC       | L         | 79    | 23.72            | -3    | -48 | 33  | R    | 51  | 21.23            | 3     | -51 | 33  |    |
|         | medF      |           |       |                  |       |     |     | R    | 34  | 7.66             | 3     | 48  | -3  |    |
|         | midF      | L         | 245   | 8.05             | -21   | 33  | 42  | R    | 331 | 8.4              | 21    | 30  | 39  |    |
|         | midO      | L         | 50    | 10.91            | -42   | -66 | 24  | R    | 22  | 11.01            | 48    | -66 | 24  |    |
|         | midT      | L         | 209   | 10.02            | -42   | -63 | 21  | R    | 264 | 14.64            | 51    | -60 | 21  |    |
|         | PCC       | L         | 87    | 55.54            | 0     | -54 | 27  | R    | 54  | 39.6             | 3     | -54 | 30  |    |
|         | postC     | L         | 10    | -3.98            | -48   | -6  | 36  |      |     |                  |       |     |     |    |
|         | preC      | L         | 93    | -3.98            | -42   | 3   | 18  | R    | 10  | -4.03            | 57    | 3   | 18  |    |
|         | Precuneus | L         | 304   | 45.83            | 0     | -57 | 24  | R    | 274 | 50.12            | 3     | -54 | 24  |    |
|         | Putamen   |           |       |                  |       |     |     | R    | 26  | -4.02            | 27    | 12  | 6   |    |
|         | Rectus    | L         | 14    | 5.74             | -6    | 60  | -15 |      |     |                  |       |     |     |    |
|         | RolOper   | L         | 44    | -3.97            | -48   | 6   | 3   | R    | 68  | -3.99            | 39    | -3  | 15  |    |
|         | supF      | L         | 199   | 9.77             | -15   | 48  | 36  | R    | 146 | 9.63             | 18    | 36  | 39  |    |
|         | supP      |           |       |                  |       |     |     | R    | 11  | -4.08            | 45    | -45 | 57  |    |
|         | SupraMarg | L         | 160   | -3.98            | -54   | -45 | 30  | R    | 216 | -3.99            | 63    | -27 | 27  |    |
| supT    | L         | 137       | -3.98 | -48              | 6     | -6  | R   | 60   | 12  | 51               | -57   | 21  |     |    |
| 1mo     | ACC       | L         | 100   | 10.65            | 0     | 45  | 15  | R    | 63  | 10.1             | 3     | 45  | 15  |    |
|         | Angular   | L         | 128   | 9.85             | -45   | -72 | 30  | R    | 149 | 11.19            | 51    | -60 | 30  |    |
|         | Calcarine | L         | 148   | 23.25            | -3    | -63 | 18  | R    | 81  | 36.96            | 3     | -60 | 15  |    |
|         | Cuneus    | L         | 110   | 24.57            | 0     | -66 | 21  | R    | 51  | 10.83            | 3     | -72 | 30  |    |
|         | infF      | L         | 565   | -3.99            | -45   | 9   | 27  | R    | 185 | -4.13            | 51    | 42  | -3  |    |
|         | infP      | L         | 81    | -3.98            | -39   | -51 | 45  | R    | 12  | -3.97            | 57    | -42 | 48  |    |
|         | infT      | L         | 113   | -3.97            | -42   | -30 | -18 | R    | 67  | 9.53             | 57    | -6  | -27 |    |
|         | Insula    | L         | 243   | -3.97            | -39   | 12  | 6   | R    | 92  | -3.98            | 48    | 3   | 0   |    |
|         | Lingual   | L         | 36    | 10.61            | 0     | -63 | 6   | R    | 47  | 14.74            | 9     | -51 | 6   |    |
|         | MCC       | L         | 90    | 14.37            | 0     | -48 | 33  | R    | 63  | 24.55            | 6     | -51 | 33  |    |
|         | medF      | L         | 26    | 9.43             | 0     | 57  | -3  | R    | 25  | 11.83            | 3     | 54  | -3  |    |
|         | midF      | L         | 219   | -3.97            | -48   | 39  | 30  | R    | 212 | -3.97            | 33    | 39  | 15  |    |
|         | midO      | L         | 47    | 10.01            | -39   | -63 | 24  | R    | 22  | 7.64             | 51    | -66 | 24  |    |
|         | midT      | L         | 95    | 7.85             | -48   | -63 | 21  | R    | 271 | 11.06            | 54    | -3  | -27 |    |
|         | PCC       | L         | 91    | 42.88            | -3    | -54 | 27  | R    | 69  | 37.82            | 3     | -48 | 27  |    |
|         | Precuneus | L         | 405   | 39.74            | 0     | -57 | 27  | R    | 312 | 41.08            | 3     | -57 | 15  |    |
|         | Putamen   | L         | 21    | -3.99            | -27   | 6   | 3   |      |     |                  |       |     |     |    |
|         | RolOper   | L         | 93    | -4.08            | -60   | 9   | 3   | R    | 43  | -3.97            | 57    | 9   | 0   |    |
|         | supF      | L         | 137   | 8.63             | -21   | 39  | 36  | R    | 120 | 8.92             | 21    | 27  | 45  |    |
|         | SupraMarg | L         | 82    | -3.99            | -60   | -27 | 21  | R    | 115 | -3.99            | 66    | -30 | 27  |    |
|         | supT      | L         | 96    | -3.97            | -51   | -6  | 3   | R    | 53  | -3.97            | 54    | 0   | -3  |    |
|         | 4mo       | ACC       | L     | 66               | 10.32 | 0   | 48  | 15   | R   | 73               | 10.9  | 3   | 48  | 18 |
|         |           | Angular   | L     | 123              | 16.29 | -42 | -63 | 24   | R   | 85               | 12.89 | 51  | -60 | 24 |
|         |           | Calcarine | L     | 107              | 16.83 | -3  | -63 | 18   | R   | 62               | 18.95 | 3   | -60 | 18 |
| Caudate |           | L         | 24    | -4.11            | -15   | 18  | 9   |      |     |                  |       |     |     |    |

|           |   |     |       |     |     |     |   |     |       |    |     |     |
|-----------|---|-----|-------|-----|-----|-----|---|-----|-------|----|-----|-----|
| Cuneus    | L | 78  | 22.4  | -3  | -63 | 24  | R | 35  | 8.23  | 3  | -72 | 30  |
| infF      | L | 142 | -3.99 | -48 | 33  | 15  | R | 84  | -3.97 | 39 | 33  | 15  |
| infP      | L | 24  | -3.98 | -54 | -45 | 39  | R | 17  | -4.07 | 57 | -39 | 51  |
| infT      | L | 54  | 8.38  | -57 | -6  | -30 | R | 35  | 7.38  | 54 | -9  | -27 |
| Insula    | L | 127 | -3.98 | -30 | 15  | -6  | R | 97  | -3.98 | 39 | 6   | -3  |
| Lingual   | L | 23  | 7.27  | -3  | -63 | 6   | R | 25  | 6.73  | 9  | -45 | 0   |
| MCC       | L | 80  | 24.04 | 0   | -48 | 33  | R | 58  | 19.25 | 3  | -51 | 33  |
| medF      | L | 18  | 7.47  | 0   | 57  | -3  | R | 23  | 7.53  | 3  | 57  | -3  |
| midF      | L | 212 | -3.97 | -42 | 48  | 18  | R | 269 | -3.98 | 36 | 54  | 24  |
| midO      | L | 24  | 13.18 | -39 | -63 | 24  | R | 16  | 7.38  | 57 | -63 | 24  |
| midT      | L | 248 | 12.33 | -42 | -63 | 21  | R | 196 | 11.14 | 54 | -60 | 21  |
| PCC       | L | 91  | 62.5  | 0   | -54 | 27  | R | 64  | 44.43 | 3  | -51 | 30  |
| Precuneus | L | 303 | 50.84 | 0   | -57 | 27  | R | 251 | 61.21 | 3  | -54 | 24  |
| Putamen   |   |     |       |     |     |     | R | 39  | -4.09 | 30 | 6   | 9   |
| RolOper   |   |     |       |     |     |     | R | 46  | -4.03 | 60 | 9   | 0   |
| SMA       |   |     |       |     |     |     | R | 10  | 6.35  | 12 | 24  | 51  |
| supF      | L | 164 | 8.02  | -18 | 30  | 45  | R | 124 | 7.18  | 21 | 30  | 45  |
| supP      |   |     |       |     |     |     | R | 12  | -3.97 | 54 | -33 | 57  |
| SupraMarg | L | 50  | -3.97 | -57 | -36 | 36  | R | 68  | -3.97 | 63 | -36 | 36  |
| supT      | L | 15  | -4    | -66 | -36 | 12  | R | 16  | 10.49 | 57 | -60 | 21  |
| ACC       | L | 112 | 9.15  | 0   | 48  | 15  | R | 115 | 9.3   | 3  | 45  | 27  |
| Angular   | L | 125 | 11.51 | -48 | -63 | 24  | R | 72  | 11.12 | 48 | -60 | 24  |
| Calcarine | L | 178 | 20.15 | 0   | -63 | 15  | R | 139 | 26.99 | 3  | -60 | 18  |
| Cuneus    | L | 83  | 24.99 | -3  | -63 | 24  | R | 27  | 9.78  | 3  | -72 | 30  |
| infF_Oper | L | 83  | -3.97 | -42 | 6   | 21  | R | 52  | -3.97 | 48 | 12  | 0   |
| infF_Orb  |   |     |       |     |     |     | R | 23  | -4.04 | 57 | 33  | -3  |
| infF_Tri  | L | 233 | -3.98 | -36 | 33  | 6   | R | 180 | -3.98 | 48 | 36  | 9   |
| infP      | L | 64  | -3.98 | -57 | -51 | 36  | R | 116 | -3.99 | 42 | -51 | 48  |
| infT      | L | 52  | 7.41  | -54 | -9  | -27 | R | 37  | 6.68  | 54 | 0   | -33 |
| Insula    | L | 112 | -3.97 | -33 | 0   | 15  | R | 191 | -4    | 39 | -3  | -9  |
| Lingual   | L | 42  | 11.45 | 0   | -63 | 6   | R | 79  | 21.47 | 3  | -60 | 6   |
| MCC       | L | 120 | 20.48 | 0   | -48 | 33  | R | 76  | 17.6  | 3  | -48 | 33  |
| medF_Orb  | L | 96  | 7.36  | -6  | 60  | -6  | R | 49  | 7.05  | 6  | 60  | -6  |
| midF      | L | 121 | 6.46  | -24 | 18  | 42  | R | 425 | -3.97 | 45 | 48  | 24  |
| midO      | L | 23  | 9.77  | -39 | -63 | 24  | R | 16  | 7.67  | 45 | -63 | 27  |
| midT      | L | 234 | 10.56 | -51 | -60 | 18  | R | 184 | 14.32 | 51 | -60 | 21  |
| PCC       | L | 93  | 33.38 | 0   | -54 | 27  | R | 67  | 27.18 | 3  | -57 | 30  |
| Precuneus | L | 352 | 33.78 | 0   | -57 | 24  | R | 280 | 34.73 | 3  | -57 | 21  |
| Putamen   |   |     |       |     |     |     | R | 43  | -4.02 | 33 | 0   | 6   |
| RolOper   | L | 57  | -4.09 | -42 | 0   | 12  | R | 63  | -4    | 57 | 3   | 6   |
| SMA       | L | 59  | -3.97 | 0   | -12 | 63  | R | 138 | -3.97 | 3  | -9  | 51  |
| supF      | L | 162 | 8.17  | -12 | 42  | 42  | R | 200 | 7.48  | 24 | 27  | 48  |
| supP      |   |     |       |     |     |     | R | 18  | -4.06 | 42 | -51 | 60  |
| SupraMarg | L | 126 | -3.97 | -66 | -24 | 30  | R | 306 | -3.98 | 51 | -45 | 33  |
| supT      | L | 29  | -3.99 | -63 | -36 | 18  | R | 68  | -3.98 | 54 | -36 | 21  |



**Table S2. Between-session seed-connective maps between two sessions.** Three seed ROI areas: (a) HippoL area; (b) HippoR area; and (c) PCC area were used to trace cognitive transition after radiotherapy (two-sample  $t$ -test;  $p$ -value  $< 0.05$  error probability for activation;  $p$ -value  $< 0.05$  cluster size constraint).

(a)

| $H_0 < 0$    | area      | side | vox   | $t_{\max}$ | x   | y   | z   | side | vox  | $t_{\max}$ | x   | y   | z   |
|--------------|-----------|------|-------|------------|-----|-----|-----|------|------|------------|-----|-----|-----|
| 1mo-pre      | Caudate   | L    | 16    | 3.08       | -15 | 9   | 9   |      |      |            |     |     |     |
|              | Fusiform  | L    | 26    | 5.08       | -30 | -6  | -36 |      |      |            |     |     |     |
|              | infF      |      |       |            |     |     |     | R    | 34   | -2.11      | 42  | 27  | -18 |
|              | Insula    |      |       |            |     |     |     | R    | 34   | -2.12      | 36  | 15  | -6  |
|              | midF      | L    | 87    | 4.22       | -36 | 9   | 57  |      |      |            |     |     |     |
|              | paraHippo | L    | 23    | 3.03       | -24 | -9  | -30 |      |      |            |     |     |     |
|              | preC      | L    | 10    | 3.88       | -39 | 3   | 57  |      |      |            |     |     |     |
|              | Putamen   | L    | 29    | 3.56       | -18 | 3   | 9   |      |      |            |     |     |     |
| supF         | L         | 42   | 3.73  | -12        | 48  | 42  |     |      |      |            |     |     |     |
| 4mo –<br>1mo | Angular   | L    | 74    | -2.12      | -45 | -72 | 36  | R    | 12   | -2.16      | 48  | -60 | 51  |
|              | Calcarine | L    | 78    | 3.52       | 0   | -72 | 15  | R    | 74   | 3.13       | 9   | -78 | 3   |
|              | Cuneus    | L    | 42    | 3.36       | -12 | -81 | 27  | R    | 88   | 3.68       | 15  | -84 | 30  |
|              | Fusiform  | L    | 54    | -2.11      | -33 | -24 | -18 |      |      |            |     |     |     |
|              | Hippo     | L    | 16    | -2.11      | -15 | -36 | 9   |      |      |            |     |     |     |
|              | infF      | L    | 16    | 3.82       | -60 | 9   | 21  |      |      |            |     |     |     |
|              | infP      | L    | 15    | -2.15      | -36 | -57 | 45  | R    | 47   | -2.13      | 51  | -48 | 48  |
|              | infT      | L    | 27    | -2.17      | -42 | -33 | -27 |      |      |            |     |     |     |
|              | Lingual   | L    | 21    | 2.73       | -6  | -66 | 6   | R    | 64   | 3.4        | 9   | -66 | 3   |
|              | MCC       | L    | 41    | 3.87       | -6  | -3  | 36  | R    | 27   | 3.23       | 6   | -12 | 39  |
|              | midF      | L    | 59    | -2.13      | -36 | 3   | 54  | R    | 16   | 3.71       | 39  | 9   | 42  |
|              | midO      | L    | 25    | 3.62       | -24 | -75 | 27  | R    | 14   | 3.29       | 30  | -78 | 30  |
|              | paraHippo | L    | 23    | -2.13      | -27 | -30 | -15 |      |      |            |     |     |     |
|              | PCC       | L    | 12    | -2.15      | -9  | -51 | 27  |      |      |            |     |     |     |
|              | postC     |      |       |            |     |     |     | R    | 33   | 3.97       | 54  | -12 | 27  |
|              | preC      | L    | 76    | 4.33       | -45 | -3  | 27  | R    | 52   | 3.49       | 39  | 3   | 42  |
|              | Precuneus | L    | 40    | -2.14      | -18 | -48 | 6   |      |      |            |     |     |     |
|              | RolOper   | L    | 21    | 3.6        | -45 | -6  | 18  |      |      |            |     |     |     |
| supF         | L         | 61   | -2.11 | -15        | 45  | 45  |     |      |      |            |     |     |     |
| supO         | L         | 45   | 3.94  | -21        | -75 | 27  | R   | 96   | 5.38 | 24         | -81 | 30  |     |
| supP         | L         |      |       |            |     |     | R   | 11   | 3.38 | 24         | -81 | 48  |     |
| SupraMarg    |           |      |       |            |     |     | R   | 24   | 3.36 | 60         | -15 | 27  |     |

(b)

| $H_0 < 0$    | area      | side | vox  | $t_{\max}$ | x   | y   | z  | side | vox   | $t_{\max}$ | x   | y   | z   |
|--------------|-----------|------|------|------------|-----|-----|----|------|-------|------------|-----|-----|-----|
| 1mo-pre      | infF      | L    | 92   | -2.11      | -51 | 27  | 9  | R    | 73    | -2.11      | 63  | 12  | 12  |
|              | infP      | L    | 16   | 3.74       | -45 | -27 | 48 | R    | 16    | 3.74       | -45 | -27 | 48  |
|              | Insula    |      |      |            |     |     |    | R    | 28    | -2.12      | 42  | 15  | -9  |
|              | Lingual   |      |      |            |     |     |    | R    | 81    | -2.11      | 24  | -60 | 0   |
|              | MCC       |      |      |            |     |     |    | R    | 19    | -2.16      | 6   | -24 | 39  |
|              | midF      | L    | 25   | 3.32       | -21 | 42  | 33 | R    | 42    | -2.11      | 33  | 3   | 57  |
|              | postC     | L    | 45   | 4.03       | -42 | -30 | 48 |      |       |            |     |     |     |
|              | preC      |      |      |            |     |     |    | R    | 61    | -2.14      | 39  | -9  | 45  |
|              | Precuneus |      |      |            |     |     |    | R    | 30    | -2.13      | 6   | -51 | 36  |
| supF         | L         | 32   | 3.51 | -27        | 48  | 39  | R  | 21   | -2.14 | 36         | -6  | 66  |     |
| 4mo –<br>1mo | Angular   | L    | 78   | -2.12      | -48 | -54 | 24 | R    | 38    | -2.14      | 51  | -57 | 42  |
|              | Cuneus    | L    | 47   | -2.2       | -12 | -69 | 21 | R    | 24    | 3.51       | 18  | -78 | 45  |
|              | Fusiform  |      |      |            |     |     |    | R    | 63    | -2.13      | 33  | -24 | -24 |

|           |   |     |       |     |     |    |   |     |       |    |     |     |
|-----------|---|-----|-------|-----|-----|----|---|-----|-------|----|-----|-----|
| infF      | L | 281 | 4.34  | -51 | 33  | 9  | R | 110 | 4.13  | 39 | 45  | -6  |
| infO      | L | 16  | 3.24  | -54 | -72 | -3 |   |     |       |    |     |     |
| infP      |   |     |       |     |     |    | R | 23  | -2.16 | 45 | -57 | 45  |
| infT      |   |     |       |     |     |    | R | 11  | -2.12 | 45 | -57 | -21 |
| Insula    | L | 22  | 4.22  | -39 | 9   | 0  |   |     |       |    |     |     |
| midF      | L | 88  | 4.66  | -33 | 51  | 30 | R | 103 | 4.45  | 39 | 54  | 0   |
| midO      | L | 11  | 2.55  | -48 | -69 | 0  |   |     |       |    |     |     |
| midT      | L | 38  | 3.8   | -51 | -66 | 0  | R | 60  | 3.72  | 57 | -45 | 0   |
| paraHippo |   |     |       |     |     |    | R | 51  | -2.12 | 24 | -18 | -27 |
| PCC       | L | 37  | -2.13 | -6  | -45 | 27 | R |     |       |    |     |     |
| postC     | L | 90  | -2.13 | -39 | -33 | 51 | R | 73  | -2.14 | 51 | -27 | 57  |
| preC      | L | 28  | 3.51  | -45 | 0   | 24 | R | 60  | -2.12 | 33 | -21 | 72  |
| Precuneus | L | 68  | -2.12 | -6  | -54 | 24 |   |     |       |    |     |     |
| RolOper   | L | 15  | 3.39  | -42 | -3  | 18 |   |     |       |    |     |     |
| SMA       | L | 31  | -2.14 | -9  | 18  | 69 | R | 12  | -2.17 | 12 | 24  | 63  |
| supF      | L | 22  | -2.13 | -18 | 24  | 57 | R | 21  | 3.27  | 30 | 51  | 9   |
| supO      |   |     |       |     |     |    | R | 70  | 4.34  | 24 | -81 | 39  |
| supP      |   |     |       |     |     |    | R | 42  | -2.13 | 30 | -54 | 69  |
| SupraMarg |   |     |       |     |     |    | R | 59  | 4.76  | 57 | -33 | 39  |
| supT      | L | 28  | 3.32  | -54 | -6  | -9 |   |     |       |    |     |     |

(c)

| $H_0 < 0$ | area      | side | vox | $t_{max}$ | x   | y    | z   | side | vox | $t_{max}$ | x  | y   | z   |
|-----------|-----------|------|-----|-----------|-----|------|-----|------|-----|-----------|----|-----|-----|
|           | Amygdala  | L    | 13  | -2.17     | -21 | -3   | -18 |      |     |           |    |     |     |
|           | Calcarine | L    | 40  | 4.14      | -15 | -102 | -3  |      |     |           |    |     |     |
|           | Caudate   | L    | 23  | -2.22     | -9  | 21   | 0   | R    | 30  | -2.11     | 12 | 21  | -6  |
|           | Cuneus    | L    | 34  | 5.13      | 0   | -81  | 33  | R    | 30  | 3.34      | 12 | -72 | 33  |
|           | Heschl    |      |     |           |     |      |     | R    | 10  | 3.13      | 48 | -18 | 6   |
|           | infF      | L    | 106 | -2.16     | -51 | 21   | 21  | R    | 27  | -2.16     | 36 | 21  | 24  |
|           | infT      |      |     |           |     |      |     | R    | 33  | 3.91      | 48 | -45 | -6  |
|           | Insula    | L    | 26  | -2.13     | -36 | 12   | 12  | R    | 14  | 4.61      | 36 | -18 | 6   |
|           | midF      | L    | 86  | -2.12     | -36 | 18   | 39  | R    | 19  | -2.11     | 30 | 18  | 39  |
| 1mo-pre   | midO      | L    | 29  | 3.24      | -9  | -96  | 0   | R    | 28  | 4.98      | 27 | -96 | 3   |
|           | midT      |      |     |           |     |      |     | R    | 27  | 4.36      | 48 | -45 | -3  |
|           | paraHippo | L    | 10  | -2.55     | -15 | 3    | -24 |      |     |           |    |     |     |
|           | postC     |      |     |           |     |      |     | R    | 25  | 3.06      | 42 | -39 | 63  |
|           | preC      | L    | 11  | -2.12     | -54 | 12   | 30  | R    | 20  | 2.45      | 36 | -27 | 63  |
|           | Precuneus | L    | 33  | 3.35      | -6  | -54  | 69  | R    | 22  | 3.74      | 3  | -57 | 69  |
|           | Putamen   | L    | 21  | -2.12     | -18 | 15   | -9  |      |     |           |    |     |     |
|           | Rectus    | L    | 27  | -2.12     | -3  | 54   | -21 |      |     |           |    |     |     |
|           | RolOper   |      |     |           |     |      |     | R    | 10  | 2.67      | 42 | -24 | 15  |
|           | supF      | L    | 18  | -2.16     | -18 | 60   | -12 |      |     |           |    |     |     |
|           | supO      | L    | 14  | 3.05      | -9  | -99  | 12  | R    | 10  | 3.89      | 24 | -99 | 3   |
|           | Angular   |      |     |           |     |      |     | R    | 52  | -2.11     | 42 | -69 | 33  |
|           | Calcarine | L    | 113 | -2.11     | -21 | -60  | 9   | R    | 76  | -2.12     | 15 | -60 | 18  |
|           | Cuneus    | L    | 16  | -2.16     | -12 | -63  | 21  |      |     |           |    |     |     |
|           | Fusiform  |      |     |           |     |      |     | R    | 83  | 2.17      | 21 | -33 | -15 |
|           | Hippo     |      |     |           |     |      |     | R    | 16  | -2.24     | 24 | -39 | 6   |
| 4mo - 1mo | infF      | L    | 436 | 5.2       | -57 | 24   | 18  |      |     |           |    |     |     |
|           | infP      | L    | 75  | 3.86      | -45 | -48  | 45  |      |     |           |    |     |     |
|           | infT      | L    | 30  | 3.92      | -45 | -57  | -6  |      |     |           |    |     |     |
|           | Insula    | L    | 66  | 5.02      | -36 | 0    | 15  |      |     |           |    |     |     |
|           | Lingual   | L    | 16  | -2.23     | -9  | -60  | 0   | R    | 39  | -2.12     | 18 | -45 | 0   |
|           | midF      | L    | 91  | 3.64      | -33 | 18   | 33  |      |     |           |    |     |     |
|           | midO      | L    | 21  | -2.15     | -12 | -102 | 3   |      |     |           |    |     |     |
|           | midT      | L    | 22  | 3.32      | -54 | -63  | 3   |      |     |           |    |     |     |

---

|           |   |     |       |     |     |    |   |    |       |    |     |     |
|-----------|---|-----|-------|-----|-----|----|---|----|-------|----|-----|-----|
| paraHippo |   |     |       |     |     |    | R | 32 | -2.11 | 33 | -39 | -12 |
| postC     | L | 12  | 3.34  | -48 | -3  | 15 | R | 38 | -2.13 | 51 | -15 | 57  |
| preC      | L | 68  | 4.15  | -39 | 3   | 18 | R | 49 | -2.12 | 48 | -9  | 60  |
| Precuneus | L | 18  | -2.12 | 0   | -57 | 18 | R | 73 | -2.12 | 12 | -45 | 15  |
| RolOper   | L | 102 | 6.12  | -57 | 3   | 3  |   |    |       |    |     |     |
| supF      | L | 18  | 2.75  | -24 | 54  | 3  |   |    |       |    |     |     |
| supP      |   |     |       |     |     |    | R | 66 | -2.12 | 24 | -72 | 60  |
| supT      | L | 68  | 6.39  | -54 | 6   | -3 |   |    |       |    |     |     |

---

## Abbreviation

|           |                                                             |
|-----------|-------------------------------------------------------------|
| ACC       | <u>A</u> nterior <u>C</u> ingulate <u>C</u> ortex           |
| Hippo     | <u>H</u> ippocampus                                         |
| infF      | <u>I</u> nferior <u>F</u> rontal Cortex                     |
| infF_Oper | <u>I</u> nferior <u>o</u> percularis <u>F</u> rontal Cortex |
| infF_Orb  | <u>I</u> nferior <u>o</u> rbital <u>F</u> rontal Cortex     |
| infF_Tri  | <u>I</u> nferior <u>t</u> riangular <u>T</u> emporal Cortex |
| infO      | <u>I</u> nferior <u>O</u> ccipital Cortex                   |
| infP      | <u>I</u> nferior <u>P</u> arietal Cortex                    |
| infT      | <u>I</u> nferior <u>T</u> emporal Cortex                    |
| MCC       | <u>M</u> iddle <u>C</u> ingulate <u>C</u> ortex             |
| medF      | <u>M</u> edial <u>F</u> rontal Cortex                       |
| medF_Orb  | <u>M</u> edial <u>o</u> rbital <u>F</u> rontal Cortex       |
| midF      | <u>M</u> iddle <u>F</u> rontal Cortex                       |
| midO      | <u>M</u> iddle <u>O</u> ccipital Cortex                     |
| midT      | <u>M</u> iddle <u>T</u> emporal Cortex                      |
| orbF      | <u>O</u> rbital <u>F</u> rontal Cortex                      |
| paraHippo | <u>p</u> ara <u>H</u> ippocampus                            |
| PCC       | <u>P</u> osterior <u>C</u> ingulate <u>C</u> ortex          |
| postC     | <u>p</u> ost <u>C</u> entral cortex                         |
| preC      | <u>p</u> re <u>C</u> entral cortex                          |
| RolOper   | Rolandic Operculum                                          |
| SMA       | <u>S</u> upplementary <u>M</u> otor <u>A</u> rea            |
| supF      | <u>S</u> uperior <u>F</u> rontal Cortex                     |
| supO      | <u>S</u> uperior <u>O</u> ccipital Cortex                   |
| supP      | <u>S</u> uperior <u>P</u> arietal Cortex                    |
| SupraMarg | <u>s</u> upra <u>M</u> arginal gyrus                        |
| supT      | <u>S</u> uperior <u>T</u> emporal Cortex                    |
